# Supplementary material
Source: Springer Nature journal article supplement (https://www.springermedizin.de/resource/supplementary/12903_2013_405_MOESM5_ESM.pdf/9516980)
Supplement: MOESM5 [file 9516980]

|                      | <b>Avoided<br/>Dentist Due to<br/>Cost<br/>(%, 95% CI)</b> | <b>Did Not Avoid<br/>Dentist Due to<br/>Cost<br/>(%, 95% CI)</b> | <b>Declined<br/>Treatment Due<br/>to Cost<br/>(%, 95% CI)</b> | <b>Did Not Decline<br/>Treatment Due<br/>to Cost<br/>(%, 95% CI)</b> |
|----------------------|------------------------------------------------------------|------------------------------------------------------------------|---------------------------------------------------------------|----------------------------------------------------------------------|
| <b>Prevention</b>    | 27.4<br>(20.9, 35.1)                                       | 10.9<br>(7.9, 14.9)                                              | 21.1<br>(15.0, 28.9)                                          | 12.3<br>(9.0, 16.6)                                                  |
| <b>Restorative</b>   | 37.7<br>(31.8, 44.0)                                       | 16.8<br>(14.0, 20.0)                                             | 36.9<br>(30.0, 44.4)                                          | 17.2<br>(14.2, 20.6)                                                 |
| <b>Surgery</b>       | 15.8<br>(12.2, 20.1)                                       | 5.7<br>(4.1, 7.8)                                                | 15.9<br>(11.7, 21.3)                                          | 5.8<br>(4.1, 8.2)                                                    |
| <b>Periodontal</b>   | 9.6<br>(6.7, 13.5)                                         | 4.1<br>(2.8, 6.1)                                                | 8.0<br>(6.1, 10.4)                                            | 4.5<br>(3.0, 6.6)                                                    |
| <b>Endodontic</b>    | 6.1<br>(3.9, 9.4)                                          | 1.1<br>(0.6, 2.1)                                                | 6.0<br>(3.3, 10.7)                                            | 1.2<br>(0.7, 1.9)                                                    |
| <b>Prosthodontic</b> | 16.2<br>(13.1, 19.8)                                       | 8.4<br>(6.2, 11.3)                                               | 15.7<br>(11.0, 21.9)                                          | 8.6<br>(6.6, 11.1)                                                   |
| <b>Urgent</b>        | 5.7<br>(3.4, 9.5)                                          | 5.9<br>(2.5, 13.4)                                               | 6.7<br>(3.2, 13.6)                                            | 5.6<br>(2.8, 10.9)                                                   |
